# Supplementary material
Source: Elsevier journal article supplement (https://www.sciencedirect.com/science/article/pii/S0213485320300712)
Supplement: mmc3 [file S0213485320300712:mmc3.pdf]

### MATERIAL SUPLEMENTARIO 3.

#### TABLA SUPPL-3. MEDIA Y DESVIACION TIPICA DE LAS RESPUESTAS A CADA ENUNCIADO (RESPUESTAS 1 A 5)

##### ENUNCIADOS.

##### 1. La imagen del especialista de neurología y las consecuencias sobre ella por la pandemia.

|     | Enunciado                                                                                                                                                                                                                                                                                                                                                                                            | media | Desv tipica |
|-----|------------------------------------------------------------------------------------------------------------------------------------------------------------------------------------------------------------------------------------------------------------------------------------------------------------------------------------------------------------------------------------------------------|-------|-------------|
| A1  | Considero que la función del especialista de neurología en general en los hospitales va a cambiar tras la pandemia                                                                                                                                                                                                                                                                                   | 2,43  | 1,399       |
| A2  | Considero que para el ciudadano las enfermedades neurológicas van a aparecer como menos relevante ante el impacto de la infección                                                                                                                                                                                                                                                                    | 2,29  | 1,204       |
| A3  | Considero que la pandemia va a aumentar el papel de especialidades que han intervenido directamente en ella frente al papel de los otros especialistas                                                                                                                                                                                                                                               | 3,64  | 0,842       |
| A4  | Considero que la pandemia va a aumentar la fuerza de los especialidades mas implicadas en la pandemia ante la administración.                                                                                                                                                                                                                                                                        | 3,86  | 0,663       |
| A5  | Considero que en general los especialistas de neurologia tendremos más dificultades en la realización de nuestra asistencia que antes de la pandemia                                                                                                                                                                                                                                                 | 3,07  | 1,207       |
| A6  | Considero que la pandemia va a modificar la elección de especialidades MIR, priorizando a aquellas especialidades mas implicadas en la pandemia                                                                                                                                                                                                                                                      | 3,07  | 0,917       |
| A7  | Considero que el hecho que muchos especialistas de neurologia y MIR de neurologia han estado en areas Covid, es una demostracion práctica que el plan formativo de neurologia es suficiente para poder realizar actividades generales como ha ocurrido, en contra de aquellos que consideraban que se precisaba una formacion general mas larga durante el periodo MIR de formacion de especialistas | 3,71  | 1,267       |
| A8  | Considero que la pandemia tendrá consecuencias neurológicas a largo plazo que deban tomarse en consideracion                                                                                                                                                                                                                                                                                         | 4,00  | 0,961       |
| A9  | Considero que la pandemia supondrá un peor pronostico de enfermedades neurológicas a largo plazo que deban tomarse en consideracion                                                                                                                                                                                                                                                                  | 3,64  | 1,151       |
| A10 | Considero que la constatacion de contagio a traves de serologia deberá incorporarse como una determinación de rutina, como en su dia lo fue la serologia luetica, a partir de ahora                                                                                                                                                                                                                  | 3,79  | 0,975       |
| A11 | Considero que los servicios de neurologia deberán tener una especialistas expertos en enfermedades infecciosas.                                                                                                                                                                                                                                                                                      | 3,50  | 1,225       |

##### 2. Bloque sobre la actividad asistencial y práctica clinica del neurólogo.

|    | Enunciado                                                                                             | media | Desv tipica |
|----|-------------------------------------------------------------------------------------------------------|-------|-------------|
| B1 | Consideras que la actividad asistencial del especialista de neurología será distinta tras la epidemia | 3,36  | 1,082       |
| B2 | Consideras que se reducirá el tiempo para la exploracion neurológica                                  | 2,86  | 1,512       |
| B3 | Consideras que la exploracion clinica se sistematizará evitando                                       | 2,77  | 1,235       |

|     |                                                                                                          |      |       |
|-----|----------------------------------------------------------------------------------------------------------|------|-------|
|     | búsqueda de datos confirmatorios                                                                         |      |       |
| B4  | Consideras que la práctica de la exploración del fondo con oftalmoscopia convencional de ojo se reducirá | 3,29 | 1,139 |
| B5  | Consideras que la exploración del reflejo nauseoso se reducirá                                           | 3,64 | 1,008 |
| B6  | Consideras que se restringirá el acceso de familiares a las consultas                                    | 4,07 | 1,141 |
| B7  | Consideras que se potenciarán las consultas telefónicas o través de métodos electrónicos                 | 4,79 | 0,426 |
| B8  | Consideras que se reducirán las punciones lumbares                                                       | 1,57 | 0,938 |
| B9  | Consideras que se eliminará el apretón de manos en el saludo en las consultas.                           | 4,07 | 0,917 |
| B10 | Consideras que se eliminarán las pases de visitas clínicas numerosas en la hospitalización               | 4,00 | 0,961 |
| B11 | Consideras que la pase de visita conjunta con enfermería se reducirá en la hospitalización               | 2,50 | 1,345 |
| B12 | Consideras que se modificarán las salas de espera de las consultas evitando el acumulo de pacientes      | 4,21 | 1,122 |
| B13 | Consideras que aumentará los tiempos entre consultas para evitar el acumulo de pacientes.                | 4,00 | 1,240 |

### 3. Bloque sobre la realización de pruebas complementarias

|     | Enunciado                                                                                                                                             | media | Desv típica |
|-----|-------------------------------------------------------------------------------------------------------------------------------------------------------|-------|-------------|
| C1  | Consideras que la indicación de pruebas diagnósticas se modificará tras la pandemia                                                                   | 2,79  | 1,122       |
| C2  | Consideras que disminuirá la indicación de tomografía computerizada                                                                                   | 1,50  | 0,650       |
| C3  | Consideras que aumentará la indicación de tomografía computerizada                                                                                    | 2,14  | 1,292       |
| C4  | Consideras que disminuirá la indicación de PET                                                                                                        | 1,62  | 0,870       |
| C5  | Consideras que disminuirá la indicación de exploraciones cognitivas                                                                                   | 2,21  | 1,311       |
| C6  | Consideras que disminuirá la indicación de ecografías                                                                                                 | 2,38  | 1,193       |
| C7  | Consideras que disminuirá la indicación de ultrasonografía de circulación cerebral                                                                    | 2,07  | 1,207       |
| C8  | Consideras que disminuirá la exploración de urodinámica                                                                                               | 2,46  | 0,877       |
| C9  | Consideras que disminuirá la indicación de estudios neurooftalmológicos                                                                               | 2,29  | 1,069       |
| C10 | Consideras que disminuirá la indicación de estudios vestibulares                                                                                      | 2,14  | 0,949       |
| C11 | Consideras que disminuirá la indicación de Electromiografía y registro de nervios periféricos                                                         | 1,86  | 1,027       |
| C12 | Consideras que disminuirá la indicación de EEG                                                                                                        | 1,71  | 0,914       |
| C13 | Consideras que disminuirá la indicación de potenciales evocados                                                                                       | 1,93  | 1,072       |
| C14 | Consideras que disminuirá la indicación de resonancia magnética                                                                                       | 1,50  | 0,650       |
| C15 | Consideras que aumentará la indicación de resonancia magnética                                                                                        | 2,29  | 1,437       |
| C16 | Consideras que disminuirá la indicación de resonancia magnética con contraste                                                                         | 1,71  | 0,825       |
| C17 | Consideras que disminuirá la indicación de angio-resonancia magnética                                                                                 | 1,62  | 0,961       |
| C18 | Consideras que aumentará la indicación de angio resonancia magnética                                                                                  | 2,29  | 1,204       |
| C19 | Consideras que se establezcan procedimientos sistemáticos de protección a facultativos y pacientes en la realización de exploraciones complementarias | 4,29  | 0,994       |

|     |                                                                                                          |      |       |
|-----|----------------------------------------------------------------------------------------------------------|------|-------|
| C20 | Consideras que la serologia covid se incorporará como una exploracion para todos los pacientes asistidos | 3,15 | 1,405 |
|-----|----------------------------------------------------------------------------------------------------------|------|-------|

#### 4. Bloque sobre las precauciones a tomar por el especialista de neurologia.

|     | Enunciado                                                                                                                               | media | Desv tipica |
|-----|-----------------------------------------------------------------------------------------------------------------------------------------|-------|-------------|
| D1  | Consideras que la forma de trabajar por el especialista de neurologia cambiará                                                          | 4,15  | 0,899       |
| D2  | Consideras que se utilizará mascarilla en pacientes con fiebre de origen desconocido                                                    | 4,79  | 0,579       |
| D3  | Consideras que se utilizará mascarilla en pacientes con fiebre de origen conocido                                                       | 4,08  | 0,954       |
| D4  | Consideras que se obligará al lavado de manos tras cada consulta                                                                        | 4,86  | 0,363       |
| D5  | Consideras que se reducirá el papel con forma de documentacion intrahospitalaria                                                        | 4,07  | 0,829       |
| D6  | Consideras que establecerá un modelo diferente para la realizacion de la historia clinica.                                              | 2,71  | 1,383       |
| D7  | Consideras que cambiará la indumentaria de los especialistas de neurologia en la hospitalización a un tipo de vestimenta mas protectora | 3,57  | 1,399       |
| D8  | Consideras que cambiará la indumentaria de los especialistas de neurologia en la consulta a un tipo de vestimenta mas protectora        | 3,07  | 1,207       |
| D9  | Consideras que se eliminará el apretón de manos en el saludo de contacto con los pacientes                                              | 3,86  | 1,027       |
| D10 | Consideras que la relacion entre compañeros cambiará en el hospital                                                                     | 3,29  | 0,967       |
| D11 | Consideras que cambiarán las salas para la discusion de pacientes.                                                                      | 3,54  | 1,069       |
| D12 | Consideras que se tomarán medidas para la informacion a los familiares                                                                  | 3,50  | 1,286       |

#### 5. Bloque sobre la organización de los servicios de neurologia.

|    | Enunciado                                                                                                                | Media | Desv Tipica |
|----|--------------------------------------------------------------------------------------------------------------------------|-------|-------------|
| E1 | Consideras que la organización de los servicios de neurologia cambiará                                                   | 3,71  | 0,994       |
| E2 | Consideras que los servicios de neurologia tendrán un responsable para velar por las precauciones sobre los facultativos | 3,07  | 1,269       |
| E3 | Consideras que la organización de las guardias de neurologia cambiarán                                                   | 2,14  | 1,027       |
| E4 | Consideras que en las guardias de neurologia se reducirán las reevaluaciones repetidas                                   | 2,43  | 0,756       |
| E5 | Consideras que la organización de las consultas va a cambiar                                                             | 4,14  | 0,864       |
| E6 | Consideras que tras la pandemia va a modificar la demanda de consultas de neurologia                                     | 3,71  | 0,994       |
| E7 | Consideras que las sobrecitaciones como metodo de disminuir la demora desaparecerá                                       | 3,86  | 1,231       |
| E8 | Consideras que los servicios de neurologia tendran recursos destinados a la atencion por telemedicina                    | 4,50  | 1,092       |
| E9 | Consideras que los pacientes que han sido covid+ tendran consultas                                                       | 2,29  | 1,139       |

|     |                                                                                                                                             |      |       |
|-----|---------------------------------------------------------------------------------------------------------------------------------------------|------|-------|
|     | específicas                                                                                                                                 |      |       |
| E10 | Consideras que los pacientes que han sido covid+ tendrán áreas hospitalarias específicas                                                    | 2,71 | 1,437 |
| E11 | Consideras que los servicios de neurología tendrán neurologos con mayor dedicación a enf infecciosas                                        | 3,14 | 1,231 |
| E12 | Consideras que los servicios de neurología deberán incorporar a sus vías clínicas, criterios dependiente si los pacientes han sido covid+   | 2,57 | 1,222 |
| E13 | Consideras que los servicios de neurología potenciarán su relación directa con los sistemas de emergencias                                  | 3,21 | 1,477 |
| E14 | Consideras que los servicios de neurología estarán preparados a una oleada de enfermedades neurológicas tras la pandemia si se presentaran. | 3,14 | 1,167 |

#### 6. Bloque sobre los nuevos recursos que debe disponer los servicios de neurología.

|     | Enunciado                                                                                                                                                             | Media | Desv<br>Típica |
|-----|-----------------------------------------------------------------------------------------------------------------------------------------------------------------------|-------|----------------|
| F1  | Consideras que la pandemia conllevará que los servicios de Neurología dispondrán de recursos adicionales                                                              | 2,43  | 1,016          |
| F2  | Consideras que la pandemia conllevará debido al consumo de recursos por la misma que los servicios de Neurología dispondrá de una disminución de recursos adicionales | 2,93  | 1,269          |
| F3  | Consideras que se dispondrán de equipos instrumentales con pantalla para valorar el fondo de ojo                                                                      | 2,64  | 1,151          |
| F4  | Consideras que se dispondrán de equipos de EMG que reduzcan el tiempo de exposición                                                                                   | 2,36  | 0,842          |
| F5  | Consideras que se dispondrán de equipos de ultrasonografía de vasos cerebrales que no precisen la movilización de la sonda                                            | 2,21  | 1,051          |
| F6  | Consideras que se dispondrán de equipos de telemedicina mejores y de mejor acceso                                                                                     | 4,07  | 1,141          |
| F7  | Consideras que se dispondrán de mayor difusión de líneas telefónicas y de acceso a internet                                                                           | 4,29  | 1,139          |
| F8  | Consideras que aumentarán los recursos en análisis de biomarcadores                                                                                                   | 3,00  | 1,109          |
| F9  | Consideras que se impulsará de forma importante los archivos electrónicos                                                                                             | 3,57  | 1,016          |
| F10 | Consideras que se aumentará la ratio de enfermería en las salas de hospitalización de neurología                                                                      | 2,07  | 0,829          |
| F11 | Consideras que conllevará la contratación de menos especialistas de neurología en favor de contratación de otros especialistas                                        | 2,57  | 1,342          |
| F12 | Consideras que conllevará la contratación de más especialistas de neurología                                                                                          | 2,21  | 0,802          |

#### 7. Bloque sobre la enfermería neurológica y el papel de la enfermería de enlace con los pacientes..

|    | Enunciado                                                                                     | Media | Desv<br>Típica |
|----|-----------------------------------------------------------------------------------------------|-------|----------------|
| G1 | Consideras que la pandemia conllevará cambios en la organización de la enfermería neurológica | 3,64  | 1,082          |
| G2 | Consideras que se potenciará la figura de enfermería de enlace con los                        | 3,86  | 1,167          |

|     |                                                                                                                                                   |      |       |
|-----|---------------------------------------------------------------------------------------------------------------------------------------------------|------|-------|
|     | pacientes                                                                                                                                         |      |       |
| G3  | Consideras que cambiará la relacion entre facultativos y enfermeria en las salas de hospitalizacion                                               | 2,50 | 1,092 |
| G4  | Consideras que cambiará la relacion entre pacientes y enfermeria en las salas de hospitalizacion                                                  | 3,43 | 1,342 |
| G5  | Consideras que cambiará la relacion entre facultativos y enfermeria en las consultas                                                              | 2,86 | 1,292 |
| G6  | Consideras que cambiará la relacion entre pacientes y enfermeria en las consultas                                                                 | 3,43 | 1,222 |
| G7  | Consideras que habrá protocolos de manejo de la documentacion en papel en la hospitalizacion                                                      | 3,46 | 1,050 |
| G8  | Consideras que habrá protocolos de manejo de la documentacion en papel en las consultas                                                           | 3,43 | 1,158 |
| G9  | Consideras que la supervision de enfermeria debe monitorizar la actuacion de los servicios de limpieza en las salas de hospitalizacion            | 4,14 | 1,292 |
| G10 | Consideras que la supervision de enfermeria debe monitorizar la actuacion de los servicios de limpieza en las consultas                           | 4,00 | 1,301 |
| G11 | Consideras que jefes de servicio y supervision de enfermeria debe monitorizar la actuacion de los servicios de limpieza en los despachos clinicos | 3,71 | 1,383 |
| G12 | Consideras que la relacion entre facultativos y enfermeria cambiará                                                                               | 3,14 | 0,949 |

#### 8. Bloque sobre la atencion al Ictus.

|     | Enunciado                                                                                                                                                          | Media | Desv Tipica |
|-----|--------------------------------------------------------------------------------------------------------------------------------------------------------------------|-------|-------------|
| H1  | Consideras que la atención al ictus cambiará debido a la pandemia                                                                                                  | 3,69  | 1,316       |
| H2  | Consideras que los planes de ictus incorporarán como variable la determinacion de covid+ como un dato a recoger por las urgencias en la aplicación de codigo ictus | 3,79  | 1,251       |
| H3  | Debido al riesgo de infeccion, consideras que los codigos ictus modificarán el criterio de edad                                                                    | 2,14  | 1,099       |
| H4  | Consideras que las unidades de ictus tendrán salas covid+ y covid-                                                                                                 | 3,71  | 1,139       |
| H5  | Consideras que si hubiera salas de ictus covid+ seguiran en el servicio de neurologia                                                                              | 3,50  | 1,698       |
| H6  | Consideras que en los pacientes covid+ se modificará las vias clinicas de atencion diagnostica                                                                     | 4,00  | 0,877       |
| H7  | Consideras que en los pacientes covid+ se modificará las vias clinicas de atencion terapeutica                                                                     | 3,21  | 1,424       |
| H8  | Consideras que en los pacientes covid+ se modificará los criterios de neurointervencion                                                                            | 3,14  | 1,292       |
| H9  | Consideras que la pandemia conllevará una menor utilizacion del codigo ictus por los pacientes                                                                     | 3,92  | 1,038       |
| H10 | Consideras que el virus sobre llevará un aumento de incidencia de ictus a medio plazo                                                                              | 3,43  | 1,016       |
| H11 | Consideras que la pandemia supondrá un incremento en la mortalidad del ictus.                                                                                      | 4,14  | 0,949       |
| H12 | Consideras que las unidades de ictus cambiarán su organización tras la pandemia                                                                                    | 3,36  | 1,151       |

## 9. Bloque sobre cambios en la docencia de la neurologia.

|     | Enunciado                                                                                                                                                                                                                                     | Media | Desv<br>Tipica |
|-----|-----------------------------------------------------------------------------------------------------------------------------------------------------------------------------------------------------------------------------------------------|-------|----------------|
| I1  | Consideras que la pandemia modificará habitos docentes en los servicios de neurologia                                                                                                                                                         | 3,79  | 1,311          |
| I2  | Consideras que la estructura de sesiones clinicas presenciales se modificará                                                                                                                                                                  | 3,93  | 0,997          |
| I3  | Consideras que la estructura de cursos presenciales se modificará                                                                                                                                                                             | 4,29  | 0,726          |
| I4  | Consideras que aumentaran las sesiones virtuales                                                                                                                                                                                              | 4,43  | 0,514          |
| I5  | Consideras que aumentaran los cursos virtuales                                                                                                                                                                                                | 4,43  | 0,514          |
| I6  | Consideras que se reduzcan las practicas hospitalarias con pacientes de los estudiantes.                                                                                                                                                      | 3,43  | 1,158          |
| I7  | Consideras que aumentarán los talleres electronicos de los estudiantes                                                                                                                                                                        | 4,07  | 0,917          |
| I8  | Consideras que cambiará el plan formativo de la especialidad como consecuencia de la pandemia                                                                                                                                                 | 2,71  | 1,267          |
| I9  | Consideras que habiendo demostrado los especialistas de neurologia y MIR de neurologia que son capaces de actuar en salas de infecciosos, no tendrá sentido aumentar los tiempos de medicina en la formacion.                                 | 3,79  | 1,424          |
| I10 | Aunque el plan de neurologia establece la rotacion obligatoria en infecciosas y eso no se ha cumplido en algunas unidades docente, la comision nacional de neurologia monotorizará el cumplimiento de esta rotacion en los futuros residentes | 3,46  | 0,967          |
| I11 | Consideras que los tutores de neurologia aseguran que los residentes en formacion adquieran las habilidades precisas para su proteccion en la practica clinica                                                                                | 4,50  | 0,650          |
| I12 | Consideras que la pandemia modificará la actitud de los residentes con los pacientes.                                                                                                                                                         | 3,57  | 1,089          |
| I13 | Consideras que los congresos de neurologia cambiaran tras la pandemia                                                                                                                                                                         | 4,07  | 0,917          |

## 10. Bloque cambios sobre la investigación neurológica.

|    | Enunciado                                                                                                                                               | Media | Desv<br>Tipica |
|----|---------------------------------------------------------------------------------------------------------------------------------------------------------|-------|----------------|
| J1 | Consideras que la pandemia modificará la investigacion en los ensayos clinicos                                                                          | 3,79  | 1,251          |
| J2 | Consideras que disminuirán los ensayos clinicos en neurologia                                                                                           | 3,14  | 0,949          |
| J3 | Consideras que se implantará un protocolo de actuacion de los monitores en cuanto al manejo de las historias                                            | 4,00  | 1,177          |
| J4 | Consideras que se implantará un protocolo de actuacion de los monitores en cuanto al acceso al hospital y a las sala donde se realiza la monitorizacion | 4,07  | 1,141          |
| J5 | Consideras que habrá un protocolo de actuacion sobre los contratados para ensayos clinicos                                                              | 3,79  | 1,051          |
| J6 | Consideras que se limitará el acceso de los contratados para ensayos clinicos a las areas asistenciales                                                 | 3,07  | 1,269          |
| J7 | Consideras que los pacientes reclutados para ensayos clinicos tendran una consideracion especifica sobre su estado covid                                | 3,57  | 1,089          |
| J8 | Consideras que en los requisitos eticos de la investigacion debe ser anonima los antecedentes de contagio a covid                                       | 1,93  | 1,269          |
| J9 | Consideras que los servicios de neurologia implantaran lineas de                                                                                        | 4,21  | 0,579          |

|     |                                                                                                                                                              |      |       |
|-----|--------------------------------------------------------------------------------------------------------------------------------------------------------------|------|-------|
|     | investigacion sobre la repercusion de Covid en el sistema nervioso                                                                                           |      |       |
| J10 | Consideras que teniendo en cuenta el alto numero de pacientes contagiados, se establecerán bases de datos especificas de las alteraciones neurologicas       | 4,64 | 0,633 |
| J11 | Consideras que la pandemia conllevará mayor numero de recursos a la investigacion en neurologia                                                              | 2,00 | 0,784 |
| J12 | Consideras que Covid generará un mayor interes por la investigacion en los neurologos.                                                                       | 2,54 | 0,877 |
| J13 | Consideras que ha sido correcta que Neurologia, como otra revistas cientificas, ha establecido un metodo de publicacion rapida a los articulos sobre Covid19 | 4,86 | 0,363 |
